# Supplementary material for: Metal-free photocatalytic degradation of 4-chlorophenol in water by mesoporous carbon nitride semiconductors
Source: Royal Society of Chemistry journal article supplement (doi:10.1039/c2cy20036h), 2012-01-01

## Electronic Supplementary Information (ESI) For

### Metal-free Photocatalytic Degradation of 4-Chlorophenol in Water

#### by Mesoporous Carbon Nitride Semiconductors

Yanjuan Cui, Jianhui Huang, Xianzhi Fu and Xinchun Wang\*

**Figure S1.** LC-MS chromatograms of 2,4-DCP solution (left) and 2,6-DCP solution (right) degraded by mpg-CN<sub>0.4</sub> under visible light irradiation at different irradiation intervals: (a) original 2,4-DCP / 2,6-DCP solution after adsorption-desorption equilibrium in the dark; (b) 2,4-DCP / 2,6-DCP solution after 60 min of irradiation.

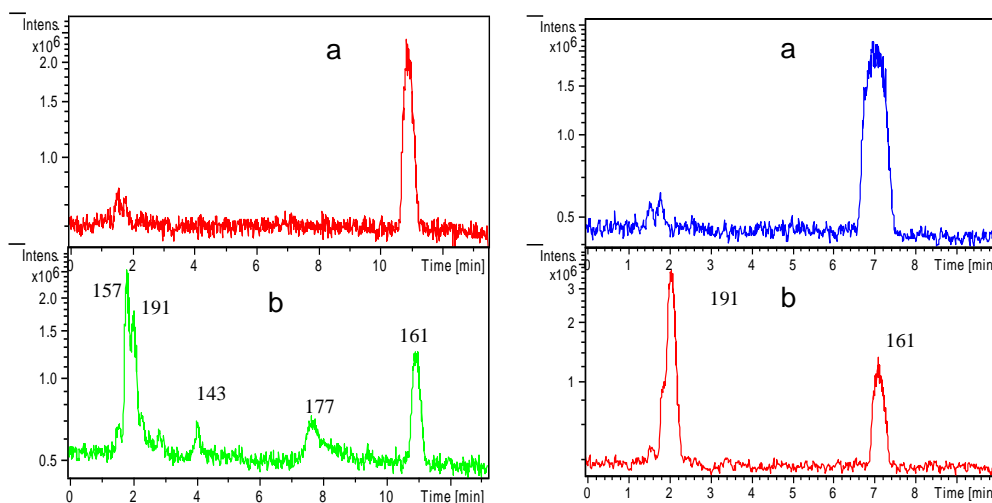

**Figure S2.** Plots of the induced fluorescence intensity (426 nm) against visible light irradiation time. (Inset: Fluorescence spectra of terephthalic acid solution for mpg-CN<sub>0.4</sub>)

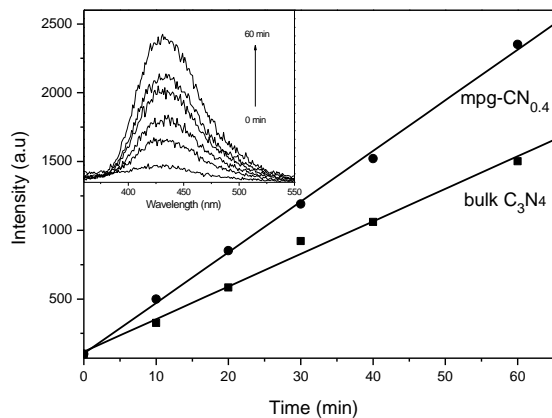

**Figure S3.** Mott-Schottky plots and band structure (inset: CB: conduction band, VB: valence band) of bulk C<sub>3</sub>N<sub>4</sub> (◆) and mpg-CN<sub>0.4</sub> (■).

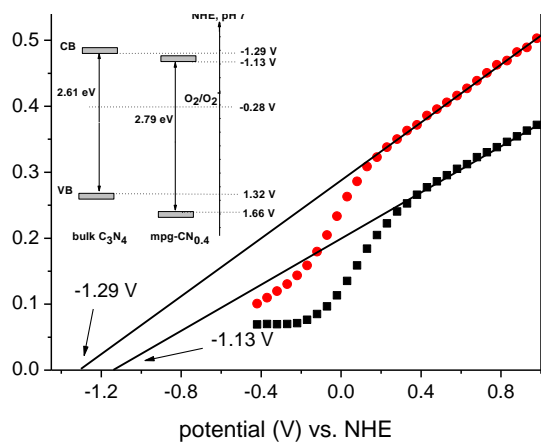

**Table S1.** Removal (%) of the Parent Substrate (a), TOC (b) and Generated Cl<sup>-</sup> Concentration (c) under Visible Light Irradiation.

| Substrate | <sup>a</sup> 100 × $\Delta[C]/[C]_0$ | <sup>b</sup> 100 × $\Delta[TOC]/[TOC]_0$ | <sup>c</sup> [Cl <sup>-</sup> ] mg/L |
|-----------|--------------------------------------|------------------------------------------|--------------------------------------|
| 4-CP      | 94                                   | 56                                       | 4.1                                  |
| 2,6-DCP   | 72                                   | 41                                       | 7.6                                  |
| 2,4-DCP   | 61                                   | 40                                       | 8.2                                  |

<sup>a</sup> after 60min of irradiation; <sup>b,c</sup> after 180 min irradiation.

**Scheme S1.** Proposed early steps in the transformation pathways of 2,4-DCP under visible light irradiation.

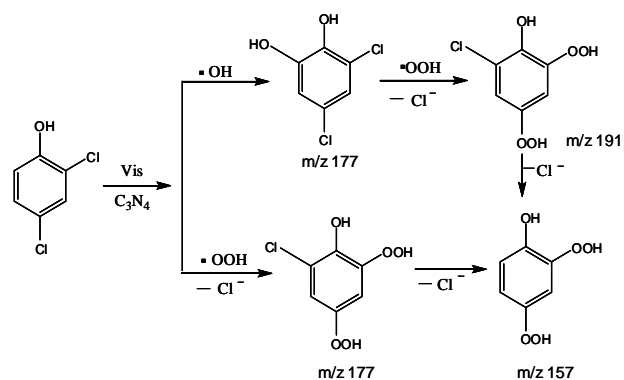

Supplement: c2cy20036h.pdf [file c2cy20036h.pdf]
